# Supplementary material for: Can low anthropometric features contribute to the non-screening for hypertension among adults in Burkina Faso: Results from the secondary analysis using the database of the 2013 WHO STEPS survey
Source: Research Square preprint supplement (doi:10.21203/rs.3.rs-1205819/v1), 2022-01-19
Supplement: Supplementary file 1 [file c27f1741247ffd56fb73de26.docx]

Table 1: Sociodemographic characteristics of overall sample, and for those who have ever been screened or never been screened for hypertension

|  | Overall | | | Had never been screened for hypertension | | | Previously screened for hypertension | | |  |
| --- | --- | --- | --- | --- | --- | --- | --- | --- | --- | --- |
|  | N = 3831 | | | N = 1592 | | | N = 2239 | | |  |
|  | N | % | CI | N | % | CI | N | % | CI | P |
| Residence |  |  |  |  |  |  |  |  |  | 0.0001 |
| - Rural area | 3019 | 78.8 | 77.5-80.1 | 1386 | 45.9 | 44.1-47.7 | 1633 | 54.1 | 52.3-55.9 |  |
| - Urban area | 812 | 21.2 | 19.9-22.5 | 206 | 25.4 | 22.4-28.5 | 606 | 74.6 | 71.5-77.6 |  |
| Sex |  |  |  |  |  |  |  |  |  | 0.0001 |
| - Male | 1822 | 47.6 | 46.0-49.2 | 913 | 50.1 | 47.8-52.4 | 909 | 49.9 | 47.6-52.2 |  |
| - Female | 2009 | 52.4 | 50.8-54.0 | 679 | 33.8 | 31.7-35.9 | 1330 | 66.2 | 64.1-68.3 |  |
| Age range (years) |  |  |  |  |  |  |  |  |  | 0.17 |
| -        25-34 | 1699 | 44.3 | 42.8-45.9 | 725 | 42.7 | 40.3-45.1 | 974 | 57.3 | 54.9-59.7 |  |
| -        35-44 | 989 | 25.8 | 24.4-27.2 | 398 | 40.2 | 37.2-43.4 | 591 | 59.8 | 56.6-62.8 |  |
| -        44-54 | 700 | 18.3 | 17.1-19.5 | 302 | 43.1 | 39.4-46.9 | 398 | 56.9 | 53.1-60.6 |  |
| -        55-64 | 443 | 11.6 | 10.6-12.6 | 167 | 37.7 | 33.2-42.4 | 276 | 62.3 | 57.6-66.8 |  |
| Marital status |  |  |  |  |  |  |  |  |  | 0.42 |
| -        Married/cohabitating | 3286 | 85.8 | 84.6-86.9 | 1357 | 41.3 | 39.6-43.0 | 1929 | 58.7 | 57.0-60.4 |  |
| -        Single | 545 | 14.2 | 13.1-15.4 | 235 | 43.1 | 38.9-47.4 | 310 | 56.9 | 52.6-61.1 |  |
| Occupation |  |  |  |  |  |  |  |  |  | 0.0001 |
| -       Jobs without or regular income* | 3598 | 93.9 | 93.1-94.7 | 1557 | 43.3 | 41.6-44.9 | 2041 | 56.7 | 41.6-44.9 |  |
| -       Employees with formal and regular income** | 233 | 6.1 | 5.3-6.9 | 35 | 15.0 | 10.7-20.3 | 198 | 85.0 | 79.7-89.3 |  |
| Education level |  |  |  |  |  |  |  |  |  | 0.0001 |
| -        No formal education | 2907 | 75.9 | 74.5-77.2 | 1309 | 45.0 | 43.2-46.9 | 1598 | 55.0 | 53.1-56.8 |  |
| - Primary school | 624 | 16.3 | 15.1-17.5 | 238 | 38.1 | 34.3-42.1 | 386 | 61.9 | 57.9-65.7 |  |
| -        Secondary or more | 300 | 9.8 | 7.0-8.7 | 45 | 15.0 | 11.2-19.6 | 255 | 85.0 | 80.4-88.8 |  |

CI: confidence interval at 95%.

Table 2: Comparison of the anthropometric and blood pressure features between adults who have ever been screened or never been screened for hypertension

|  | Overall | | **Had never been screened for hypertension** | | **Previously screened for hypertension** | |  |
| --- | --- | --- | --- | --- | --- | --- | --- |
|  | N=3831 | | n= 1592 | | n=2239 | |  |
|  | X̅ | SD | X̅ | SD | X̅ | SD | P |
| Heigh (cm) | 166.2 | 8.4 | 166.6 | 8.2 | 165.9 | 8.5 | 0.010 |
| Weight (kg) | 61.8 | 11.9 | 60.4 | 10.3 | 62.8 | 12.6 | 0.0001 |
| Body mass index (kg/m²) | 22.4 | 3.9 | 21.8 | 3.2 | 22.9 | 4.3 | 0.0001 |
| Waist circumference (cm) | 78.1 | 11.6 | 76.5 | 11.3 | 79.2 | 11.7 | 0.0001 |
| Systolic blood pressure (mmHg) | 123.3 | 17.4 | 123.2 | 16.8 | 123.4 | 17.8 | 0.70 |
| Diastolic blood pressure (mmHg) | 78.4 | 10.9 | 77.5 | 10.4 | 79.0 | 11.3 | 0.0001 |
| Differential blood pressure (mmHg) | 45.0 | 12.0 | 45.8 | 11.9 | 44.4 | 12.1 | 0.0007 |
|  | n (%) | CI | n (%) | CI | n (%) | CI | P |
| ‡Nutritional state, % (95% CI) |  |  |  |  |  |  | 0.0001* |
| - Underweight | 412 (10.8) | 9.8-11.8 | 189 (11.9) | 10.3-13.6 | 223 (10.0) | 8.8-11.3 | 0.06 |
| - Normal | 2706 (70.6) | 69.2-72.1 | 1196 (75.1) | 72.9-77.2 | 1510 (67.4) | 65.5-69.4 | 0.0001 |
| - Overweight | 533 (13.9) | 12.8-15.0 | 172 (10.8) | 9.3-12.4 | 361 (16.1) | 14.6-17.7 | 0.0001 |
| - Obese | 180 (4.7) | 4.1-5.4 | 35 (2.2) | 1.5-3.0 | 145 (6.5) | 5.5-7.6 | 0.0001 |
| Waist circumference categories (IFD cut-offs) |  |  |  |  |  |  | 0.0001 |
| - Absence of abdominal obesity | 2975 (77.7) | 76.3-79.0 | 1356 (85.2) | 83.3-86.9 | 1619 (72.3) | 70.4-74.2 |  |
| - Presence of abdominal obesity | 856 (22.3) | 21.0-23.7 | 236 (14.8) | 13.1-16.7 | 620 (27.7) | 25.8-30.0 |  |
| Waist circumference categories (SSA cut-offs) |  |  |  |  |  |  | 0.0001 |
| - Absence of abdominal obesity | 2673 (69.8) | 68.3-71.2 | 1240 (77.9) | 75.8-79.9 | 1433 (64.0) | 62.0-66.0 |  |
| - Presence of abdominal obesity | 1158 (30.2) | 28.8-31.7 | 352 (22.1) | 20.1-24.2 | 806 (36.0) | 34.0-38.0 |  |
| Blood pressure levels |  |  |  |  |  |  | 0.029* |
| - Normal | 1543 (40.3) | 38.7-41.8 | 654 (41.1) | 38.7-43.5 | 889 (39.7) | 37.7-41.8 | 0.38 |
| - Prehypertension | 1547 (40.4) | 38.8-42.0 | 662 (41.6) | 39.1-44.0 | 885 (39.5) | 37.5-41.6 | 0.19 |
| - Hypertension | 741 (19.3) | 18.1-20.6 | 276 (17.3) | 15.5-19.3 | 465 (20.8) | 19.1-22.5 | 0.007 |

*Global p-value.

Table 3: Associated factors with the uptake of the screening for hypertension

|  | Univariable analysis | | | Multivariable analysis | | |
| --- | --- | --- | --- | --- | --- | --- |
|  | cOR | 95% CI | p-value | aOR | 95% CI | p-value |
| Residence |  |  |  |  |  |  |
| - Rural area | 1 |  |  | 1 |  |  |
| - Urban area | 2.5 | 2.1-3.0 | 0.0001 | 1.5 | 1.3-1.9 | 0.0001 |
| Sex |  |  |  |  |  |  |
| - Male | 1 |  |  | 1 |  |  |
| - Female | 2.0 | 1.7-2.2 | 0.0001 | 2.2 | 1.9-2.5 | 0.0001 |
| Age range (years) |  |  |  |  |  |  |
| -        25-34 | 1 |  |  | 1 |  |  |
| -        35-44 | 1.1 | 0.9-1.3 | 0.22 | 1.1 | >0.9-1.4 | 0.12 |
| -        44-54 | >0.9 | 0.8-1.2 | 0.83 | 1.1 | 0.9-1.3 | 0.57 |
| -        55-64 | 1.2 | >0.9-1.5 | 0.059 | 1.5 | 1.2-1.9 | 0.0001 |
| Marital status |  |  |  |  |  |  |
| -        Single | 1 |  |  | 1 |  |  |
| -        Married/cohabitating | 1.1 | 0.9-1.3 | 0.42 | 1.4 | 1.2-1.7 | 0.001 |
| Occupation |  |  |  |  |  |  |
| -     Works without regular income* | 1 |  |  | 1 |  |  |
| -      Employees without regular income** | 4.3 | 3.0-6.2 | 0.0001 | 2.2 | 1.4-3.3 | 0.0001 |
| Education level |  |  |  |  |  |  |
| -        No formal education | 1 |  |  | 1 |  |  |
| - Primary school | 1.3 | 1.1-1.6 | 0.002 | 1.3 | 1.1-1.6 | 0.009 |
| -        Secondary or more | 4.6 | 3.4-6.4 | 0.0001 | 3.0 | 2.0-4.5 | 0.0001 |
| BMI categories |  |  |  |  |  |  |
| - Normal | **1** |  |  | **1** |  |  |
| - Underweight | 0.9 | 0.8-1.2 | 0.52 | 0.9 | 0.7-1.1 | 0.33 |
| - Overweight/obesity | 1.9 | 1.6-2.3 | 0.0001 | 1.2 | 1.1-1.5 | 0.045 |
| Waist circumference |  |  |  |  |  |  |
| - Absence of abdominal obesity | **1** |  |  | **1** |  |  |
| - Presence of abdominal obesity | 2.0 | 1.7-2.3 | 0.0001 | 1.3 | 1.1-1.6 | 0.002 |
